# Supplementary material
Source: publisher site journal article supplement (http://www.spandidos-publications.com/5921/downloadSupplementary)
Supplement: Supplementary file 1 [file downloadSupplementary]

## Sheet: FR gene sets
Table SI. A total of 259 genes related to ferroptosis sourced from FerrDb.
Gene abbreviation	Gene description
ABCC1	ATP binding cassette subfamily C member 1
ACO1	aconitase 1
ACSF2	acyl-CoA synthetase family member 2
ACSL3	acyl-CoA synthetase long chain family member 3
ACSL4	acyl-CoA synthetase long chain family member 4
ACVR1B	activin A receptor type 1B
AGPAT3	1-acylglycerol-3-phosphate O-acyltransferase 3
AIFM2	apoptosis inducing factor mitochondria associated 2
AKR1C1	aldo-keto reductase family 1 member C1
AKR1C2	aldo-keto reductase family 1 member C2
AKR1C3	aldo-keto reductase family 1 member C3
ALB	albumin
ALOX12	arachidonate 12-lipoxygenase, 12S type
ALOX12B	arachidonate 12-lipoxygenase, 12R type
ALOX15	arachidonate 15-lipoxygenase
ALOX15B	arachidonate 15-lipoxygenase type B
ALOX5	arachidonate 5-lipoxygenase
ALOXE3	arachidonate lipoxygenase 3
ANGPTL7	angiopoietin like 7
ANO6	anoctamin 6
ARNTL	aryl hydrocarbon receptor nuclear translocator-like
ARRDC3	arrestin domain containing 3
ASNS	asparagine synthetase
ATF3	activating transcription factor 3
ATF4	activating transcription factor 4
ATG13	serine/threonine protein kinase regulatory subunit ATG13
ATG16L1	autophagy related 16 like 1
ATG3	autophagy related 3
ATG4D	autophagy related 4D cysteine peptidase
ATG5	autophagy related 5
ATG7	autophagy related 7
ATM	ATM serine/threonine kinase
ATP5MC3	ATP synthase membrane subunit c locus 3
ATP6V1G2	ATPase H+ transporting V1 subunit G2
AURKA	aurora kinase A
BACH1	BTB domain and CNC homolog 1
BAP1	BRCA1 associated protein 1
BECN1	beclin 1
BID	BH3 interacting domain death agonist
BLOC1S5-TXNDC5	BLOC1S5-TXNDC5 readthrough
BNIP3	BCL2 interacting protein 3
BRD4	bromodomain containing 4
CA9	carbonic anhydrase 9
CAPG	capping actin protein, gelsolin like
CARS1	cysteinyl-tRNA synthetase 1
CAV1	caveolin 1
CBS	cystathionine beta-synthase
CD44	CD44 molecule
CDKN1A	cyclin dependent kinase inhibitor 1A
CDKN2A	cyclin dependent kinase inhibitor 2A
CDO1	cysteine dioxygenase type 1
CEBPG	CCAAT enhancer binding protein gamma
CHAC1	ChaC glutathione specific gamma-glutamylcyclotransferase 1
CHMP5	charged multivesicular body protein 5
CHMP6	charged multivesicular body protein 6
CISD1	CDGSH iron sulfur domain 1
CISD2	CDGSH iron sulfur domain 2
CS	citrate synthase
CXCL2	chemokine (C-X-C motif) ligand 2
CYBB	cytochrome b-245 beta chain
DDIT3	DNA-damage inducible transcript 3
DDIT4	DNA-damage inducible transcript 4
DNAJB6	DnaJ heat shock protein family (Hsp40) member B6
DPP4	dipeptidyl peptidase 4
DRD4	dopamine receptor D4
DRD5	dopamine receptor D5
DUOX1	dual oxidase 1
DUOX2	dual oxidase 2
DUSP1	dual specificity phosphatase 1
EGFR	epidermal growth factor receptor
EGLN2	egl-9 family hypoxia inducible factor 2
EIF2AK4	eukaryotic translation initiation factor 2 alpha kinase 4
EIF2S1	eukaryotic translation initiation factor 2 subunit alpha
ELAVL1	ELAV like RNA binding protein 1
EMC2	ER membrane protein complex subunit 2
ENPP2	ectonucleotide pyrophosphatase/phosphodiesterase 2
EPAS1	endothelial PAS domain protein 1
FADS2	fatty acid desaturase 2
FANCD2	FA complementation group D2
FBXW7	F-box and WD repeat domain containing 7
Fer1HCH	Ferritin 1 heavy chain homologue
FH	fumarate hydratase
FLT3	fms related receptor tyrosine kinase 3
FTH1	ferritin heavy chain 1
FTL	ferritin light chain
FTMT	ferritin mitochondrial
G6PD	glucose-6-phosphate dehydrogenase
G6PDX	glucose-6-phosphate dehydrogenase X-linked
GABARAPL1	GABA type A receptor associated protein like 1
GABARAPL2	GABA type A receptor associated protein like 2
GABPB1	GA binding protein transcription factor subunit beta 1
GCH1	GTP cyclohydrolase 1
GCLC	glutamate-cysteine ligase catalytic subunit
GDF15	growth differentiation factor 15
GLS2	glutaminase 2
GLUT13	solute carrier family 2 member 13
GOT1	glutamic-oxaloacetic transaminase 1
GPT2	glutamic--pyruvic transaminase 2
GPX2	glutathione peroxidase 2
GPX4	glutathione peroxidase 4
HAMP	hepcidin antimicrobial peptide
HBA1	hemoglobin subunit alpha 1
HELLS	helicase, lymphoid specific
HERPUD1	homocysteine inducible ER protein with ubiquitin like domain 1
HIC1	HIC ZBTB transcriptional repressor 1
HIF1A	hypoxia inducible factor 1 subunit alpha
HILPDA	hypoxia inducible lipid droplet associated
HMGB1	high mobility group box 1
HMOX1	heme oxygenase 1
HNF4A	hepatocyte nuclear factor 4 alpha
HRAS	HRas proto-oncogene, GTPase
HSD17B11	hydroxysteroid 17-beta dehydrogenase 11
HSF1	heat shock transcription factor 1
HSPA5	heat shock protein family A (Hsp70) member 5
HSPB1	heat shock protein family B (small) member 1
IDH1	isocitrate dehydrogenase (NADP(+)) 1
IFNG	interferon gamma
IL33	interleukin 33
IL6	interleukin 6
IREB2	iron responsive element binding protein 2
ISCU	iron-sulfur cluster assembly enzyme
JDP2	Jun dimerization protein 2
JUN	Jun proto-oncogene, AP-1 transcription factor subunit
KEAP1	kelch like ECH associated protein 1
KIM-1	hepatitis A virus cellular receptor 1
KLHL24	kelch like family member 24
KRAS	KRAS proto-oncogene, GTPase
LAMP2	lysosomal associated membrane protein 2
LINC00336	long intergenic non-protein coding RNA 336
LINC00472	long intergenic non-protein coding RNA 472
LOC284561	long intergenic non-protein coding RNA 2806
LOC390705	protein phosphatase 2 regulatory subunit B'', beta pseudogene
LONP1	lon peptidase 1, mitochondrial
LPCAT3	lysophosphatidylcholine acyltransferase 3
LPIN1	lipin 1
LURAP1L	leucine rich adaptor protein 1 like
MAFG	MAF bZIP transcription factor G
MAP1LC3A	microtubule associated protein 1 light chain 3 alpha
MAP3K5	mitogen-activated protein kinase kinase kinase 5
MAPK1	mitogen-activated protein kinase 1
MAPK14	mitogen-activated protein kinase 14
MAPK3	mitogen-activated protein kinase 3
MAPK8	mitogen-activated protein kinase 8
MAPK9	mitogen-activated protein kinase 9
MIOX	myo-inositol oxygenase
MIR137	microRNA 137
MIR17	microRNA 17
MIR212	microRNA 212
MIR30B	microRNA 30B
MIR4715	microRNA 4715
MIR6852	microRNA 6852
MIR9-1	microRNA 9-1
MIR9-2	microRNA 9-2
MIR9-3	microRNA 9-3
MT1G	metallothionein 1G
MT3	metallothionein 3
MTDH	metadherin
MTOR	mechanistic target of rapamycin kinase
MUC1	mucin 1, cell surface
MYB	MYB proto-oncogene, transcription factor
NCF2	neutrophil cytosolic factor 2
NCOA4	nuclear receptor coactivator 4
NF2	NF2, moesin-ezrin-radixin like (MERLIN) tumor suppressor
NFE2L2	NFE2 like bZIP transcription factor 2
NFS1	NFS1 cysteine desulfurase
NGB	neuroglobin
NNMT	nicotinamide N-methyltransferase
NOS2	nitric oxide synthase 2, inducible
NOX1	NADPH oxidase 1
NOX3	NADPH oxidase 3
NOX4	NADPH oxidase 4
NOX5	NADPH oxidase 5
NQO1	NAD(P)H quinone dehydrogenase 1
NRAS	NRAS proto-oncogene, GTPase
OTUB1	OTU deubiquitinase, ubiquitin aldehyde binding 1
OXSR1	oxidative stress responsive kinase 1
PANX1	pannexin 1
PCK2	phosphoenolpyruvate carboxykinase 2, mitochondrial
PEBP1	phosphatidylethanolamine binding protein 1
PGD	phosphogluconate dehydrogenase
PHKG2	phosphorylase kinase catalytic subunit gamma 2
PIK3CA	phosphatidylinositol-4,5-bisphosphate 3-kinase catalytic subunit alpha
PLIN2	perilipin 2
PLIN4	perilipin 4
PML	PML nuclear body scaffold
PRDX1	peroxiredoxin 1
PRDX6	peroxiredoxin 6
PRKAA1	protein kinase AMP-activated catalytic subunit alpha 1
PRKAA2	protein kinase AMP-activated catalytic subunit alpha 2
PROM2	prominin 2
PSAT1	phosphoserine aminotransferase 1
PTGS2	prostaglandin-endoperoxide synthase 2
RB1	RB transcriptional corepressor 1
RELA	RELA proto-oncogene, NF-kB subunit
RGS4	regulator of G protein signaling 4
RIPK1	receptor interacting serine/threonine kinase 1
RPL8	ribosomal protein L8
RRM2	ribonucleotide reductase regulatory subunit M2
SAT1	spermidine/spermine N1-acetyltransferase 1
SCD	stearoyl-CoA desaturase
SCP2	sterol carrier protein 2
SELENOS	selenoprotein S
SESN2	sestrin 2
SETD1B	SET domain containing 1B, histone lysine methyltransferase
SIRT1	sirtuin 1
SLC1A4	solute carrier family 1 member 4
SLC1A5	solute carrier family 1 member 5
SLC2A1	solute carrier family 2 member 1
SLC2A12	solute carrier family 2 member 12
SLC2A14	solute carrier family 2 member 14
SLC2A3	solute carrier family 2 member 3
SLC2A6	solute carrier family 2 member 6
SLC2A8	solute carrier family 2 member 8
SLC38A1	solute carrier family 38 member 1
SLC3A2	solute carrier family 3 member 2
SLC40A1	solute carrier family 40 member 1
SLC7A11	solute carrier family 7 member 11
SLC7A5	solute carrier family 7 member 5
SNORA16A	small nucleolar RNA, H/ACA box 16A
SNX4	sorting nexin 4
SOCS1	suppressor of cytokine signaling 1
SP1	Sp1 transcription factor
SQSTM1	sequestosome 1
SRC	SRC proto-oncogene, non-receptor tyrosine kinase
SRXN1	sulfiredoxin 1
STAT3	signal transducer and activator of transcription 3
STEAP3	STEAP3 metalloreductase
STMN1	stathmin 1
TAZ	Tafazzin
TF	transferrin
TFAP2C	transcription factor AP-2 gamma
TFR2	transferrin receptor 2
TFRC	transferrin receptor
TGFBR1	transforming growth factor beta receptor 1
TLR4	toll-like receptor 4
TMBIM4	transmembrane BAX inhibitor motif containing 4
TNFAIP3	TNF alpha induced protein 3
TP53	tumor protein p53
TP63	tumor protein p63
TRIB3	tribbles pseudokinase 3
TSC22D3	TSC22 domain family, member 3
TUBE1	tubulin epsilon 1
TXNIP	thioredoxin interacting protein
TXNRD1	thioredoxin reductase 1
UBC	ubiquitin C
ULK1	unc-51 like autophagy activating kinase 1
ULK2	unc-51 like autophagy activating kinase 2
VDAC2	voltage dependent anion channel 2
VEGFA	vascular endothelial growth factor A
VLDLR	very low density lipoprotein receptor
WIPI1	WD repeat domain, phosphoinositide interacting 1
WIPI2	WD repeat domain, phosphoinositide interacting 2
XBP1	X-box binding protein 1
YWHAE	tyrosine 3-monooxygenase/tryptophan 5-monooxygenase activation protein epsilon
YY1AP1	YY1 associated protein 1
ZEB1	zinc finger E-box binding homeobox 1
ZFP36	ZFP36 ring finger protein
ZFP69B	ZFP69 zinc finger protein B
ZNF419	zinc finger protein 419
